# Supplementary material for: Fluorescently Labeled α-Conotoxin TxID, a New Probe for α3β4 Neuronal Nicotinic Acetylcholine Receptors
Source: MDPI journal article supplement (doi:10.3390/md20080511), 2022-08-12
Supplement: s1 [file s1]

# Supplementary Materials:

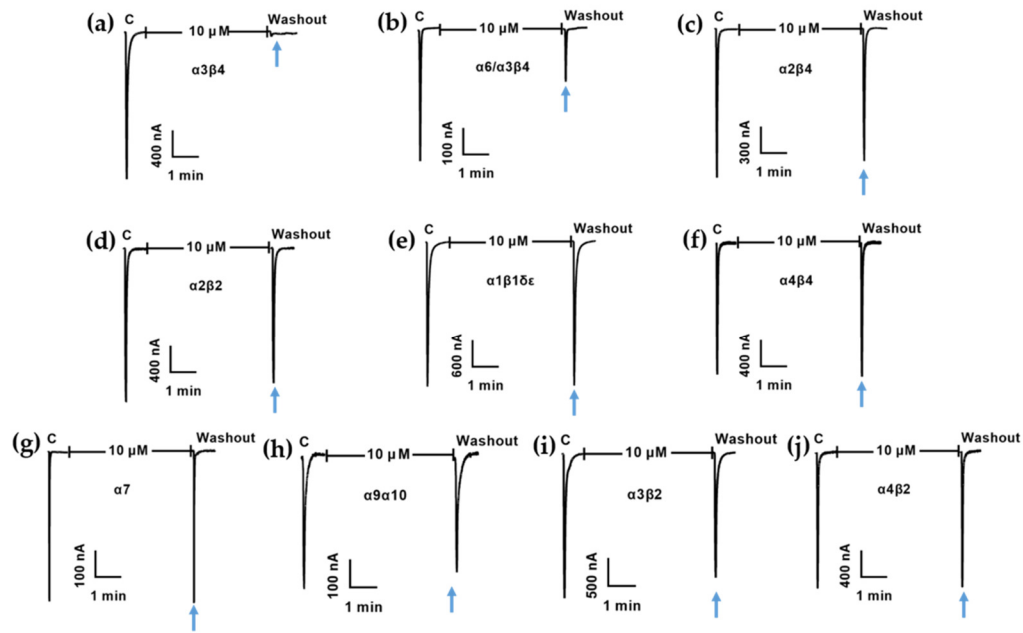

Figure S1: Electrophysiological activity of TxID-F. The potency of TxID-F on various nAChR subtypes.  $\alpha 3\beta 4$  (a),  $\alpha 6/\alpha 3\beta 4$  (b),  $\alpha 2\beta 4$  (c),  $\alpha 2\beta 2$  (d),  $\alpha 1\beta 1\delta\epsilon$  (e),  $\alpha 4\beta 4$  (f),  $\alpha 7$  (g),  $\alpha 9\beta 10$  (h),  $\alpha 3\beta 2$  (i), and  $\alpha 4\beta 2$  (j) nAChRs. In each panel, "C" indicates the control response to ACh. *Xenopus laevis* oocytes expressing the indicated nAChRs were voltage-clamped at a holding potential of  $-70$  mV. representative ACh-evoked currents were obtained in the presence of  $10\text{ }\mu\text{M}$  TxID-F, the oocyte was exposed to  $10\text{ }\mu\text{M}$  TxID-F for 5 min (arrow) and applied 1 s pulses of ACh to the oocyte in 1 min sweep, the flow rate of ND96 solution was 2 mL/min. All receptors are of rat origin, except  $\alpha 1\beta 1\delta\epsilon$  which is of mouse origin.
